# Supplementary material for: Functional diversification of Argonautes in nematodes: an expanding universe
Source: PubMed Central journal article supplement (PMC3782831; doi:10.1042/bst20130086), 2013-07-18

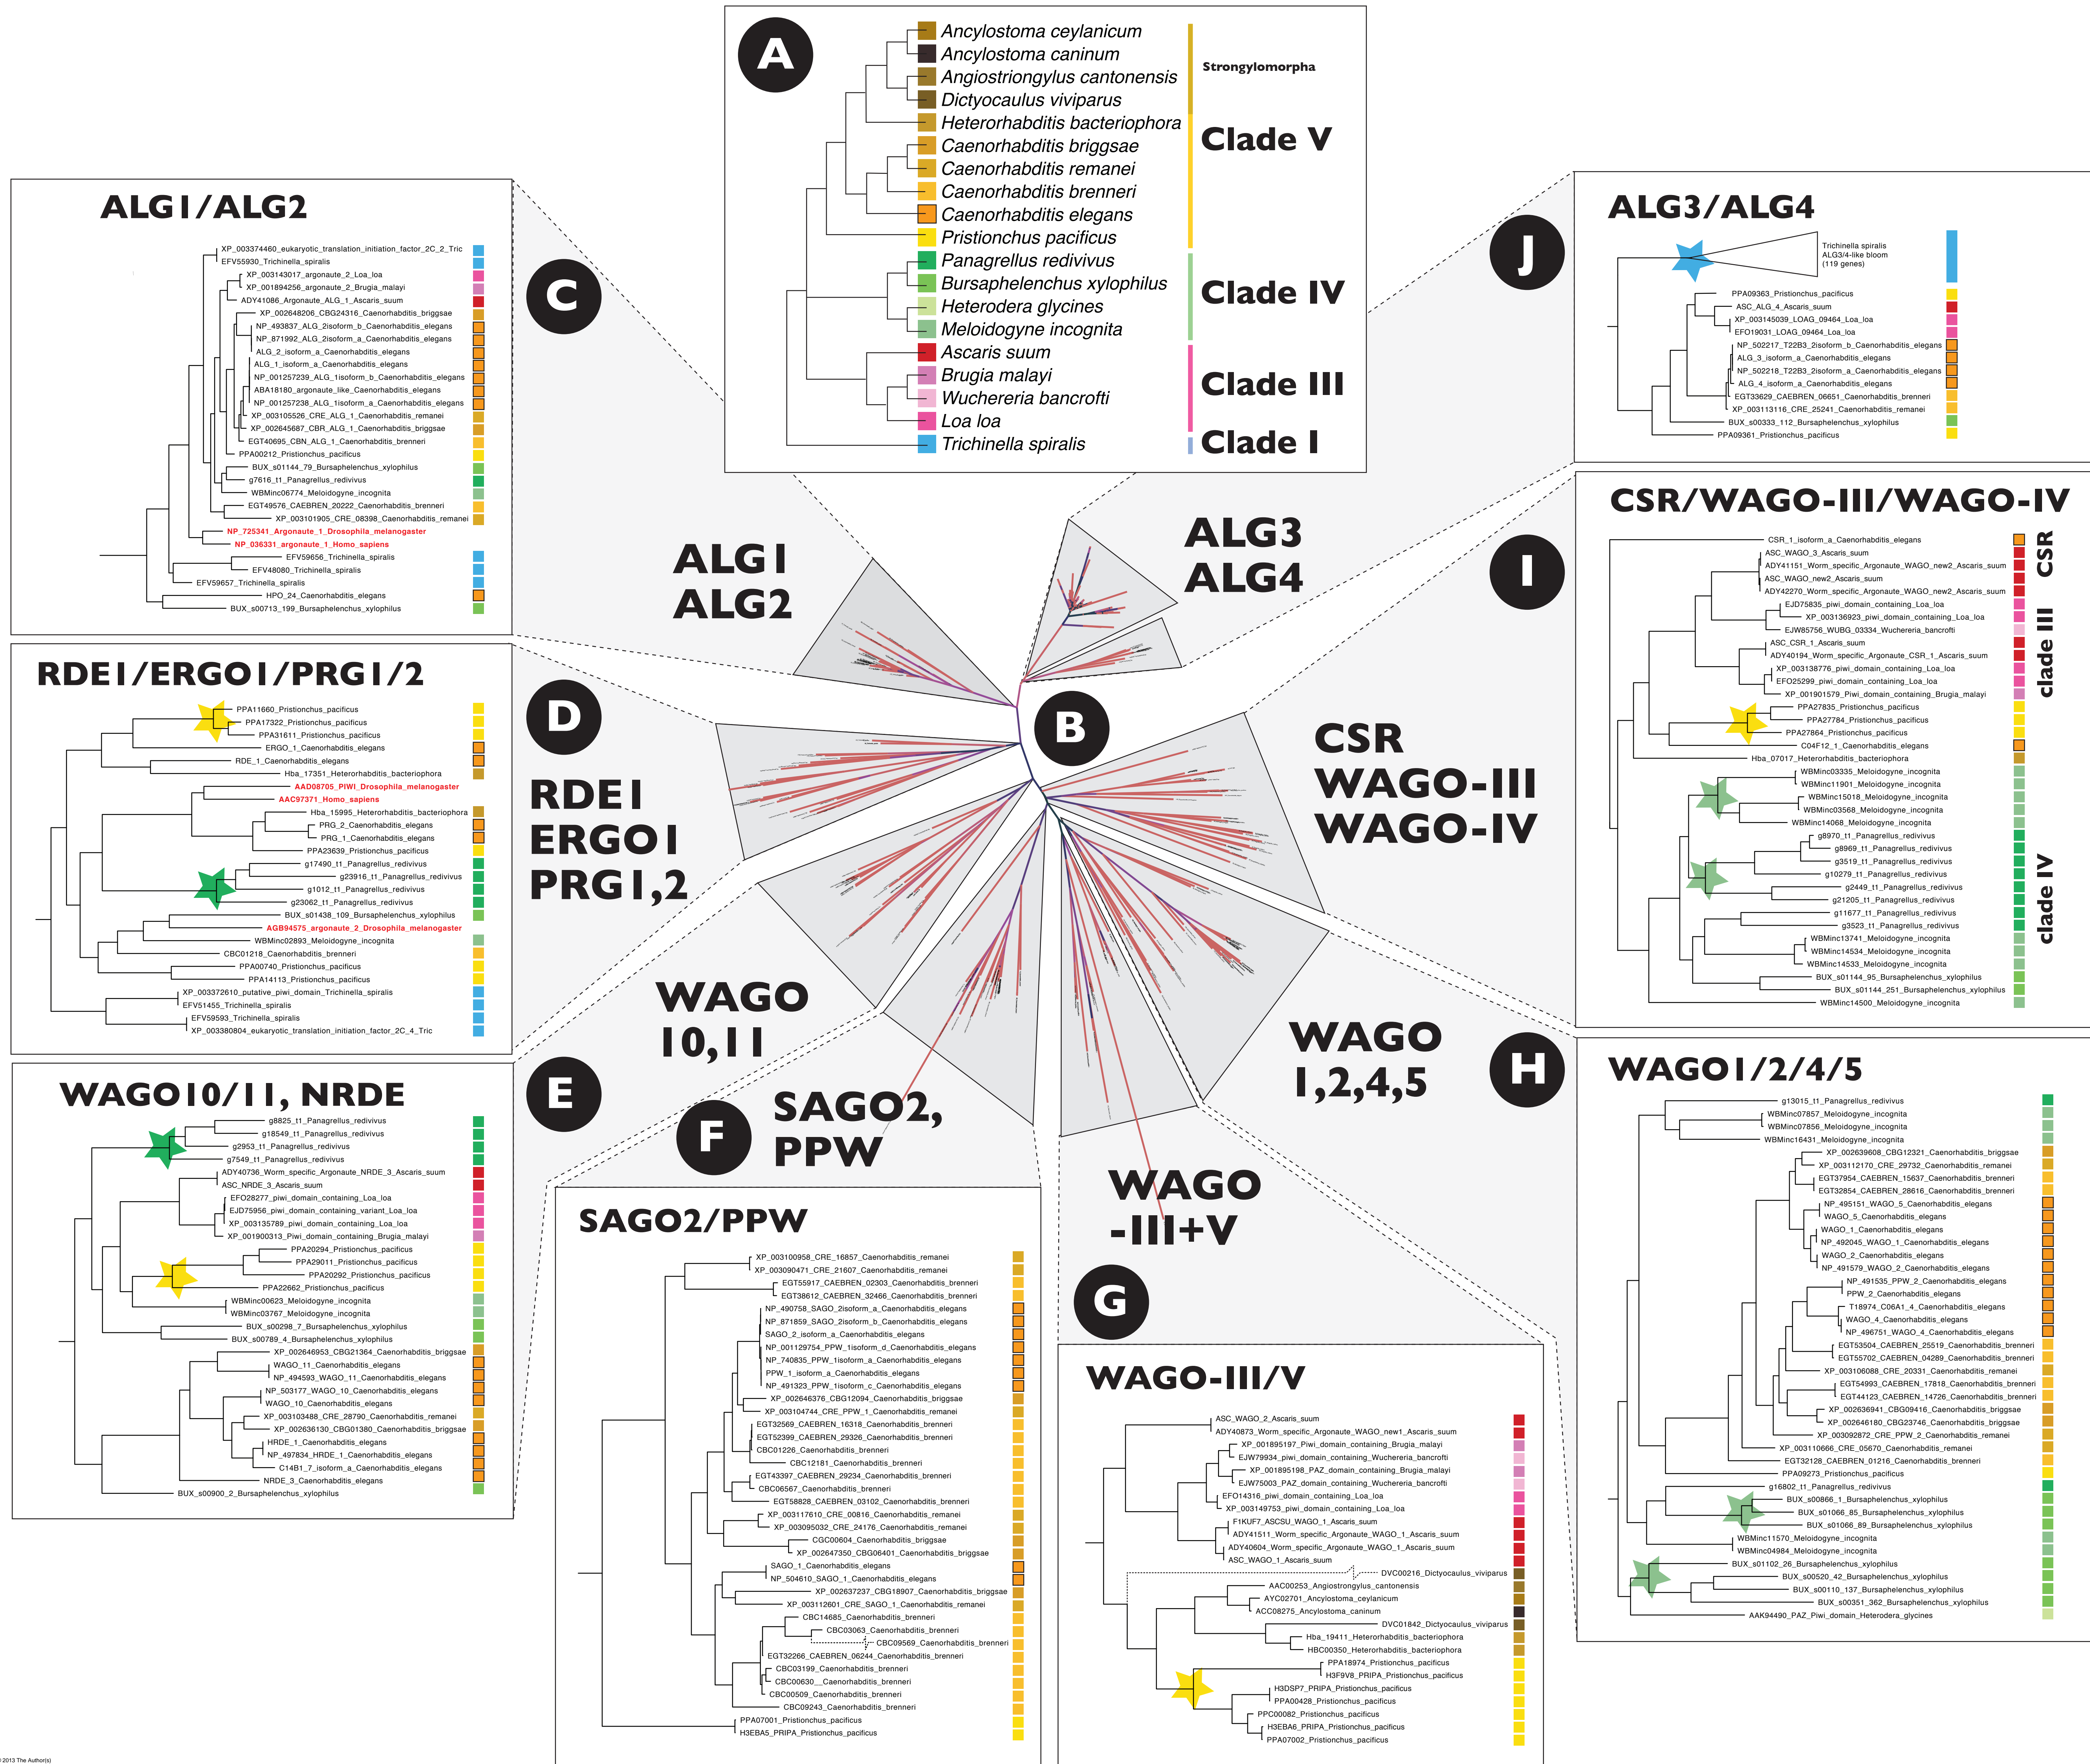

Supplement: bst0410881add.pdf [file bst0410881add.pdf]
